# Supplementary material
Source: publisher site journal article supplement (https://www.dovepress.com/article/570129)
Supplement: Supplementary file 1 [file Supplementary%20Materials.docx]

**Supplementary Materials**

Mindful Attention Awareness Scale (MAAS) Items (15 items)

X1:I may become aware of certain emotions only after they have persisted for a while.

X2:I may damage or break items out of carelessness, inattention, or preoccupation with other thoughts.

X3:I cannot concentrate well on what is happening in the present moment.

X4:I tend to hurry to where I'm going without paying attention to things along the way.

X5:I usually do not notice physical tension or discomfort until it becomes quite severe.

X6:I forget people's names almost instantly when they first introduce themselves.

X7:I seem to keep busy mechanically, without being aware of what I am doing at all.

X8:I often rush to get things done without really paying attention to what I am doing.

X9:I am so focused on the goals I pursue that I lose sight of the process.

X10:I always work or perform tasks mechanically, without conscious awareness.

X11:I often find myself doing other things while listening to others.

X12:I often drive or ride to a place out of habit, but when I arrive, I cannot figure out why I went there.

X13:I tend to be overly preoccupied with future or past events.

X14:Sometimes I do not even notice what I am doing.

X15:I always eat quickly without savoring my food.
